# Supplementary material for: Electrical Stimuli-Responsive Decomposition of Layer-by-Layer Films Composed of Polycations and TEMPO-Modified Poly(acrylic acid)
Source: MDPI journal article supplement (doi:10.3390/polym14245349), 2022-12-07
Supplement: s1 [file s1]

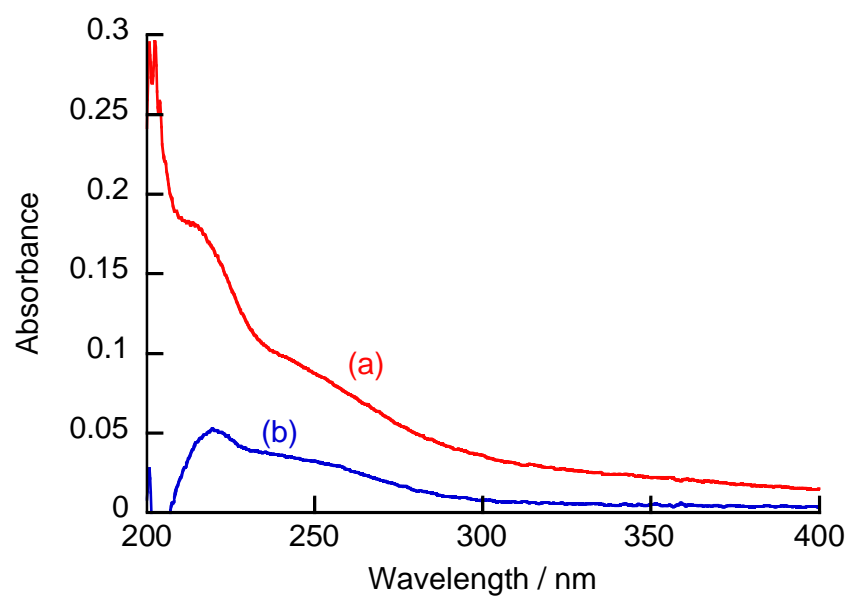

**Figure S1.** UV-vis absorption spectra for the (PEI/TEMPO-PAA)<sub>5</sub> film (a) before and (b) after exposure to 1 mM sodium hypochlorite solution (pH 10) for 30 min. A LbL film was prepared on the surface of a quartz slide. The (PEI/TEMPO-PAA)<sub>5</sub> films exposed in sodium hypochlorite solution were rinsed with working buffer for 5 min.
